# Supplementary material
Source: PubMed Central journal article supplement (PMC11374090)
Supplement: PBI-22-1078-s013.pdf [file PBI-22-1078-s013.pdf]

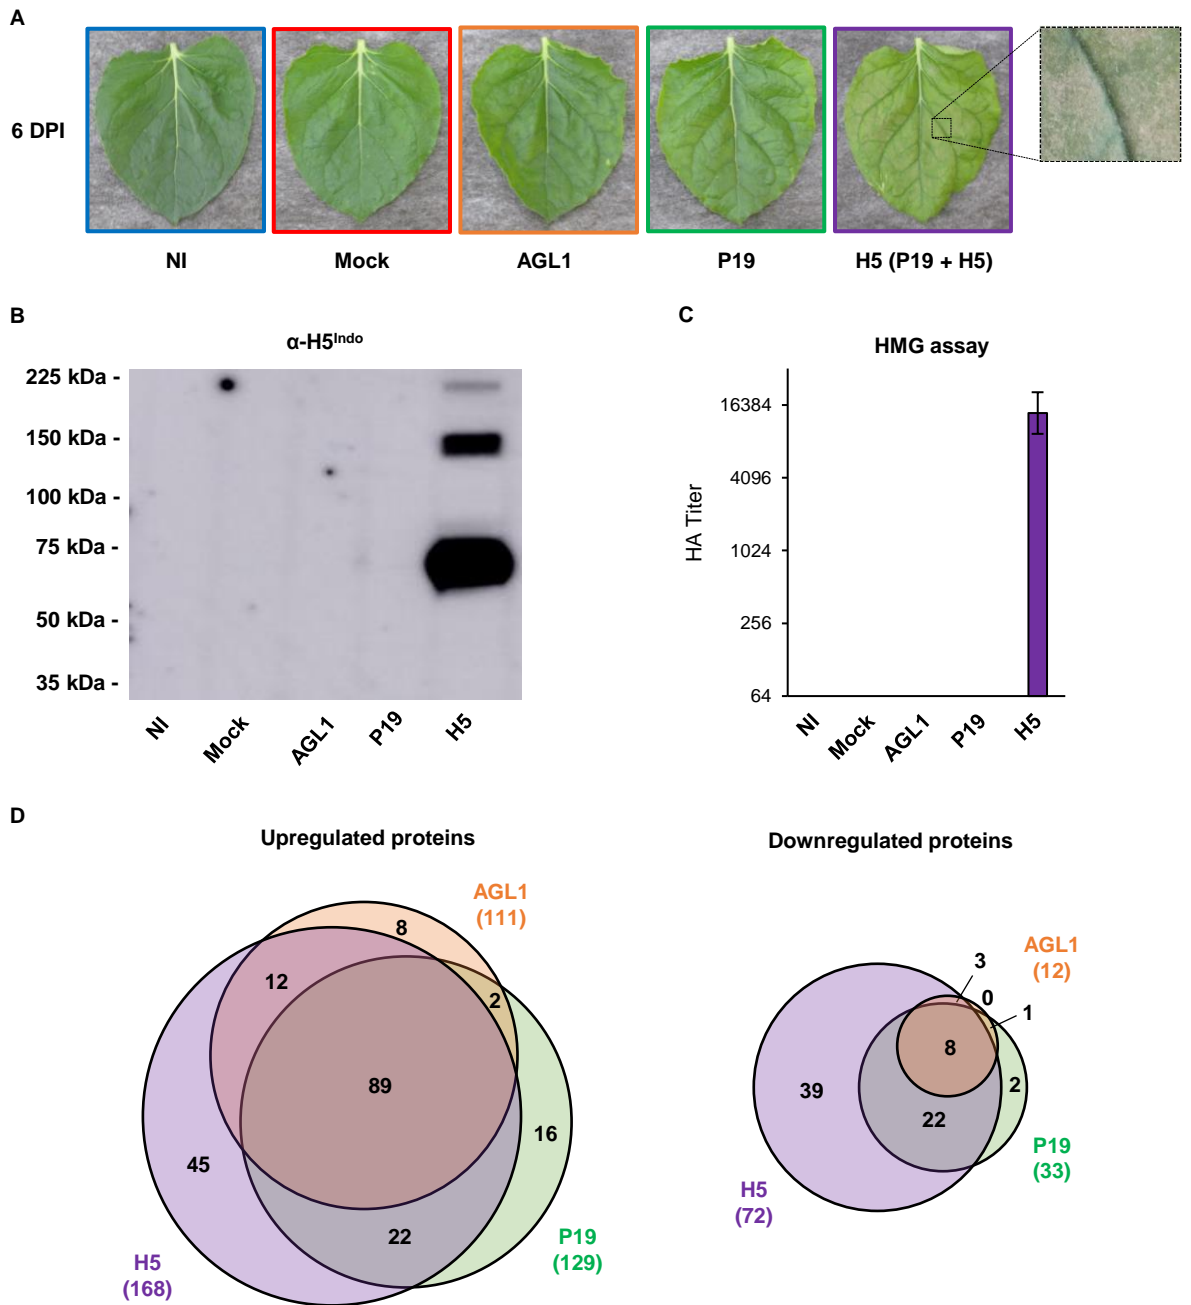

**Figure S2. Stress symptoms and analysis of biomass used for proteomics.** (A) Stress symptoms observed on representative leaves from each condition harvested at 6 DPI. A magnified leaf section highlights necrotic flecking seen when expressing H5. (B) Western blot confirming H5 protein accumulation. (C) Hemagglutination (HMG) assay confirming HA protein activity. (D) Venn diagrams depicting up- and downregulated proteins after pairwise comparisons: AGL1 vs Mock, P19 vs Mock, and H5 vs Mock. Circle size is proportional to the number of significantly regulated proteins. Proteins specific to AGL1 samples are shown in orange. Proteins specific to P19 samples are shown in green. Proteins specific to H5 samples are shown in purple. Diagram intersects show proteins common to more than one condition. Condition names are as follows: NI: non-infiltrated leaves; Mock: leaves infiltrated with buffer only; AGL1: leaves infiltrated with *Agrobacterium* strain AGL1 that carry a binary vector control; P19: leaves infiltrated with AGL1 and expressing P19 only; H5: leaves infiltrated with AGL1 and co-expressing P19 and H5.

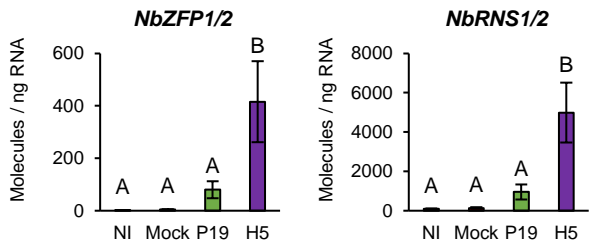

**Figure S3. Expression of OPDA-specific genes.** Expression of genes specifically induced by OPDA as measured by RTqPCR at 6 DPI. Results are expressed in numbers of molecules per ng of RNA. Groups that do not share the same letter are statistically different. Condition names are as follows: NI: non-infiltrated leaves; Mock: leaves infiltrated with buffer only; P19: leaves infiltrated with AGL1 and expressing P19 only; H5: leaves infiltrated with AGL1 and co-expressing P19 and H5.

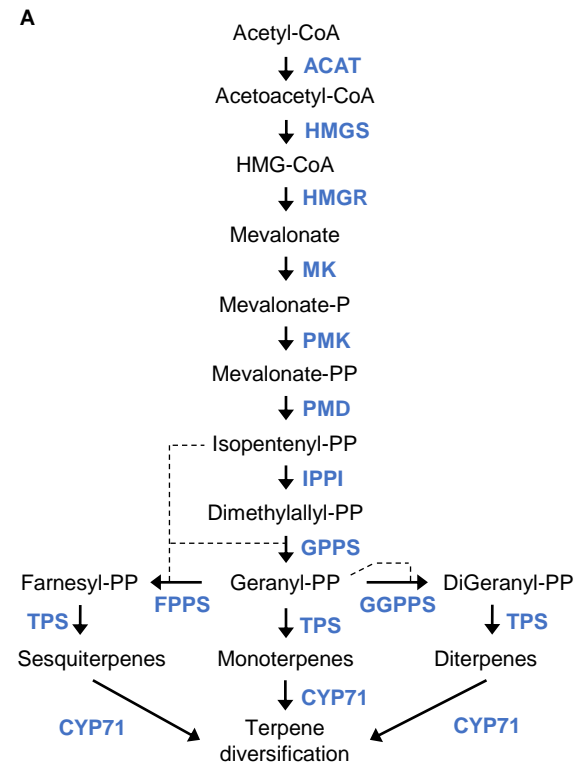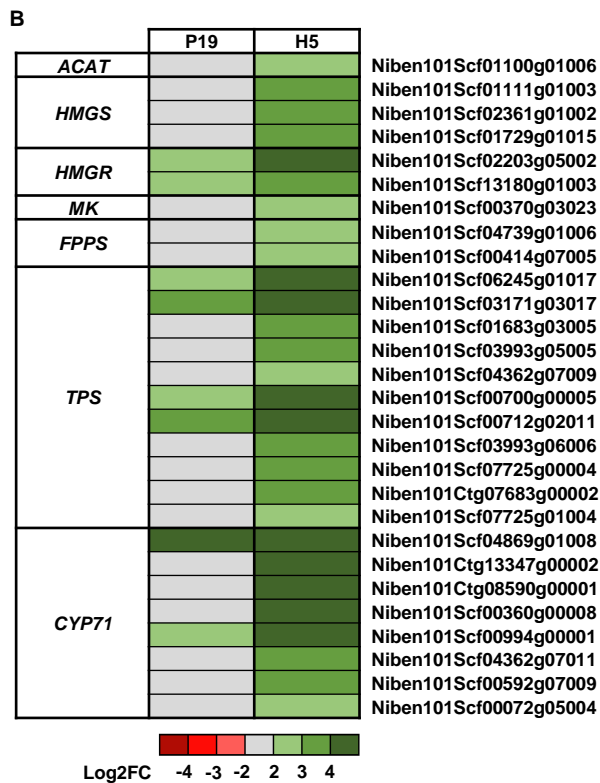

**ACAT:** acetoacetyl-CoA thiolase

**CYP71:** cytochrome P450 of family 71

**FPPS:** farnesyl pyrophosphate synthase

**GGPPS:** geranyl geranyl diphosphate synthase

**GPPS:** geranyl diphosphate synthase

**HMGR:** hydroxymethylglutaryl-CoA reductase

**HMGS:** hydroxymethylglutaryl-CoA synthase

**IPPI:** isopentyl diphosphate isomerase

**MK:** mevalonate kinase

**PMD:** mevalonate diphosphate decarboxylase

**PMK:** phosphomevalonate kinase

**TPS:** terpene synthase

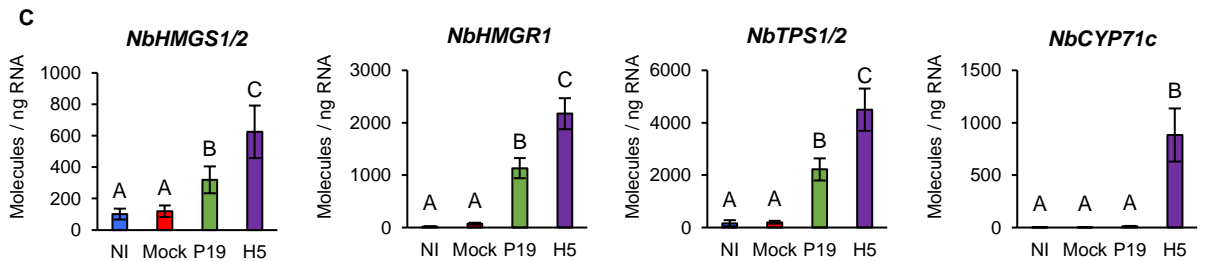

**Figure S4. Expression of terpene-related genes.** (A) Overview of the mevalonate pathway. Metabolic intermediates are shown in black while enzymes are shown in blue. (B) Heat-map depicting expression of genes involved in terpene synthesis and diversification at 6 DPI. Each line represents a gene shown in the Table S12. Grey indicates genes that are not differentially expressed. Green are red colored gradients respectively reflect extent of gene up- and downregulation, as indicated. (C) Expression of genes involved in terpene synthesis and diversification as measured by RTqPCR at 6 DPI. Results are expressed in numbers of molecules per ng of RNA. Groups that do not share the same letter are statistically different. Condition names are as follows: NI: non-infiltrated leaves; Mock: leaves infiltrated with buffer only; P19: leaves infiltrated with AGL1 and expressing P19 only; H5: leaves infiltrated with AGL1 and co-expressing P19 and H5.

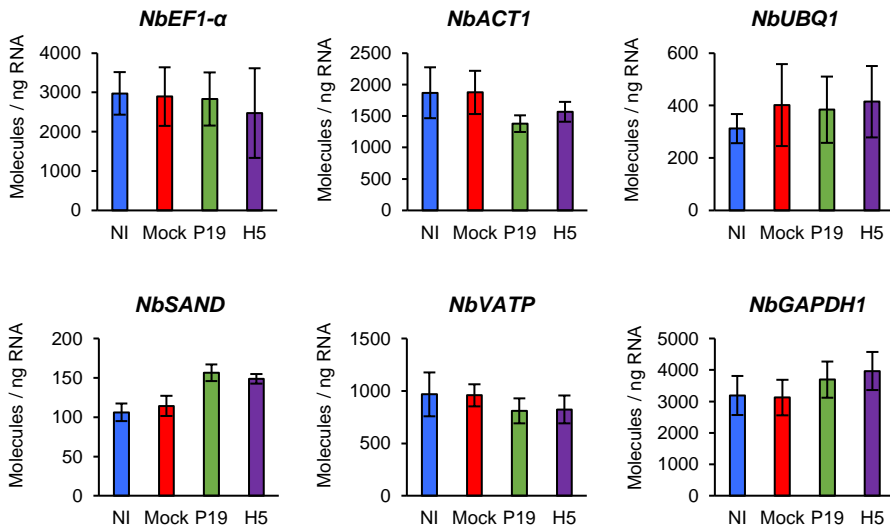

**Figure S5. Expression of reference genes.** Expression of housekeeping genes used to normalize RTqPCR data at 6 DPI. Results are expressed in numbers of molecules per ng of RNA. No statistically significant difference was observed between the groups. Condition names are as follows: NI: non-infiltrated leaves; Mock: leaves infiltrated with buffer only; P19: leaves infiltrated with AGL1 and expressing P19 only; H5: leaves infiltrated with AGL1 and co-expressing P19 as well as H5.
